# Supplementary material
Source: ML conference proceedings conference paper supplement (https://openreview.net/forum?id=oDoPiR8wZJ)
Supplement: supplementary_material [file DASIP appendix v3.pdf › DASIP appendix v3.pdf]

## Appendix A Mathematical Foundations

### A.1 Stochastic Interpolant Formulation

**Definition 1** (Stochastic Interpolant). Given densities  $\rho_0, \rho_1 : \mathbb{R}^d \rightarrow \mathbb{R}_{\geq 0}$ , a stochastic interpolant is defined as:

$$x_t = I(t, x_0, x_1) + \gamma(t)z, \quad t \in [0, 1]$$

where  $I(0, x_0, x_1) = x_0$ ,  $I(1, x_0, x_1) = x_1$ ,  $\gamma(0) = \gamma(1) = 0$ ,  $\gamma(t) > 0$  for  $t \in (0, 1)$ ,  $(x_0, x_1) \sim \nu$  marginalizing to  $\rho_0$  and  $\rho_1$ , and  $z \sim \mathcal{N}(0, I_d)$  independent of  $(x_0, x_1)$ .

This formulation induces a time-dependent density  $\rho_t$  with  $\rho_0$  and  $\rho_1$  as boundary conditions. The velocity field transporting  $\rho_t$  is:

$$b(t, x) = \mathbb{E}[\dot{x}_t | x_t = x] = \mathbb{E}[\partial_t I(t, x_0, x_1) + \dot{\gamma}(t)z | x_t = x]$$

#### A.1.1 Extension to Observation-Conditioned Policies

For robotic control applications, we extend this framework to incorporate conditioning on observations, which is essential for generating situation-appropriate actions.

**Definition 2** (Observation-Conditioned Flow Policy). Given robot observations  $\mathbf{o}$ , we sample the target action from the conditional distribution  $\mathbf{x}_* \sim p(\mathbf{x} | \mathbf{o})$ . The interpolant becomes:

$$\mathbf{x}_t = \alpha_t \mathbf{x}_* + \sigma_t \varepsilon, \quad \alpha_0 = 1, \alpha_1 = 0, \sigma_0 = 0, \sigma_1 = 1$$

where  $\varepsilon \sim \mathcal{N}(\mathbf{0}, \mathbf{I})$  is standard Gaussian noise independent of  $\mathbf{x}_*$  and  $\mathbf{o}$ .

The conditional velocity field is then defined as:

$$\mathbf{v}(\mathbf{x}, t, \mathbf{o}) = \mathbb{E}[\dot{\mathbf{x}}_t | \mathbf{x}_t = \mathbf{x}, \mathbf{o}] = \dot{\alpha}_t \mathbb{E}[\mathbf{x}_* | \mathbf{x}_t = \mathbf{x}, \mathbf{o}] + \dot{\sigma}_t \mathbb{E}[\varepsilon | \mathbf{x}_t = \mathbf{x}, \mathbf{o}]$$

This conditioning mechanism allows our policy to generate actions specifically tailored to the current robot state, a critical capability for effective control in complex environments. By learning this conditional velocity field, the robot can map from observations to appropriate action distributions that account for the current context.

### A.2 Linear-Gaussian Bridge Representation

For practical implementation, we employ the linear-Gaussian bridge formulation:

$$\mathbf{x}_t = \alpha_t \mathbf{x}_* + \sigma_t \varepsilon, \quad \alpha_0 = 1, \alpha_1 = 0, \sigma_0 = 0, \sigma_1 = 1 \quad (5)$$

where  $\mathbf{x}_*$  represents the target action and  $\varepsilon \sim \mathcal{N}(\mathbf{0}, \mathbf{I})$ . This formulation provides a specific instantiation of the stochastic interpolant with coefficients  $\alpha_t$  and  $\sigma_t$  that satisfy certain boundary conditions.

### A.3 Conversion Relationships for Prediction Targets

The stochastic interpolant framework enables conversion between different prediction targets, which is essential for our flexible inference approach.

**Theorem 1** (Score-Velocity Relation). For a stochastic interpolant with coefficients  $\alpha_t$  and  $\sigma_t$ , the velocity field  $\mathbf{v}(\mathbf{x}, t, \mathbf{o})$  and score function  $s(\mathbf{x}, t, \mathbf{o}) = \nabla_{\mathbf{x}} \log p_t(\mathbf{x} | \mathbf{o})$  are related by:

$$s(\mathbf{x}, t, \mathbf{o}) = \sigma_t^{-1} \frac{\alpha_t \mathbf{v}(\mathbf{x}, t, \mathbf{o}) - \dot{\alpha}_t \mathbf{x}}{\dot{\alpha}_t \sigma_t - \alpha_t \dot{\sigma}_t} \quad (6)$$

**Theorem 2** (Reverse-time SDE). The reverse SDE corresponding to the conditional density  $p_t(\mathbf{x} | \mathbf{o})$  is given by:

$$d\mathbf{X}_t = \left[ \mathbf{v}(\mathbf{X}_t, t, \mathbf{o}) - \frac{1}{2} w_t s(\mathbf{X}_t, t, \mathbf{o}) \right] dt + \sqrt{w_t} d\bar{\mathbf{W}}_t \quad (7)$$

with different diffusion schedule  $w_t$  and reverse Wiener process  $\bar{\mathbf{W}}_t$ .

These relationships provide exact, differentiable mappings among velocity, score, and noise targets, allowing the policy to switch between training objectives or inference solvers without retraining.

#### 391 A.4 Interpolation Path Formulations

392 We consider several interpolation paths that connect the noise distribution ( $\mathbf{x}_0$ ) to the data manifold  
393 ( $\mathbf{x}_1$ ):

**Definition 3** (Linear Interpolant).

$$\alpha_t = 1 - t, \quad \sigma_t = t$$

394 A straight path suited to well-behaved trajectories.

**Definition 4** (Variance-Preserving (VP)).

$$\alpha_t = \exp\left(-\frac{1}{2} \int_0^t \beta_s \, ds\right), \quad \sigma_t = \sqrt{1 - \exp\left(-\int_0^t \beta_s \, ds\right)}$$

395 A diffusion schedule  $\beta_t$  that controls the rate of noise addition while maintaining the variance-  
396 preserving property.

**Definition 5** (Generalized VP (GVP)).

$$\alpha_t = \cos\left(\frac{\pi}{2}t\right), \quad \sigma_t = \sin\left(\frac{\pi}{2}t\right)$$

397 Trigonometric path with  $\alpha_t^2 + \sigma_t^2 = 1$  for all  $t$ , yielding smoother gradients and better stability.

#### 398 A.5 Numerical Solution Methods

399 The following numerical methods allow sampling from our stochastic interpolant models:

400 **Definition 6** (Probability Flow ODE). The probability flow ODE corresponding to the stochastic  
401 interpolant is:

$$\frac{d}{dt} \mathbf{X}_t = b(t, \mathbf{X}_t | \mathbf{o}) \tag{8}$$

402 which can be solved using numerical integrators such as Euler or Heun methods.

403 **Definition 7** (Forward SDE). The forward SDE corresponding to the stochastic interpolant can be  
404 derived from the reverse-time SDE and written as:

$$d\mathbf{X}_t = \mathbf{f}(t, \mathbf{X}_t, \mathbf{o})dt + \sqrt{w_t}d\mathbf{W}_t \tag{9}$$

405 where  $\mathbf{f}$  is the drift term that depends on time, current state, and observations,  $w_t$  is the same diffusion  
406 schedule used in the reverse-time SDE, and  $\mathbf{W}_t$  is a standard Wiener process. This formulation  
407 introduces controlled stochasticity that can be beneficial for exploration in certain robotic tasks.

## Appendix B Implementation Details

This appendix provides key implementation details of our DA-SIP framework.

### B.1 Stochastic Interpolant Policy Implementation

Table 6: Stochastic interpolant policy hyperparameters

| Parameter          | Value                | Parameter         | Value           |
|--------------------|----------------------|-------------------|-----------------|
| Optimizer          | AdamW                | Weight decay      | 1e-6            |
| Learning rate      | 1e-4                 | Schedule          | Cosine decay    |
| Batch size         | 256                  | Gradient clipping | 1.0             |
| Training epochs    | 5,000                | Checkpointing     | Every 50 epochs |
| Loss function      | MSE                  | EMA rate          | 0.9999          |
| Prediction targets | Velocity/Score/Noise | LR Scheduler      | Cosine decay    |
| Interpolants       | Linear/VP/GVP        | warmup steps      | 500             |

### B.2 Lightweight CNN Classifier

Our CNN classifier uses three convolutional blocks followed by fully connected layers:

Table 7: Lightweight CNN architecture and training parameters

| Architecture |                                             | Training Parameters |                              |
|--------------|---------------------------------------------|---------------------|------------------------------|
| Input        | RGB image $32 \times 32 \times 3$           | Optimizer           | Adam                         |
| Conv1        | 32 filters, $3 \times 3$ , BatchNorm, ReLU  | Learning rate       | 1e-3                         |
| MaxPool1     | $2 \times 2$ stride 2                       | Batch size          | 64                           |
| Conv2        | 64 filters, $3 \times 3$ , BatchNorm, ReLU  | Epochs              | 100                          |
| MaxPool2     | $2 \times 2$ stride 2                       | Early stopping      | patience=15                  |
| Conv3        | 128 filters, $3 \times 3$ , BatchNorm, ReLU | Loss function       | Categorical cross-entropy    |
| MaxPool3     | $2 \times 2$ stride 2                       | Class weighting     | Inverse frequency            |
| Flatten      | 2048 units                                  | Validation split    | 20%                          |
| FC1          | 256 units, ReLU, Dropout(0.5)               | Augmentation        | Flip, rotation, color jitter |
| FC2          | 6 units, Softmax                            |                     |                              |

We apply histogram equalization per color channel and use weighted random sampling to handle class imbalance with:

$$\text{weights} = \frac{n_{\text{samples}}}{n_{\text{classes}} \times \text{class\_counts}} \quad (10)$$

### B.3 Zero-shot VLM Classification

We use few-shot in-context learning with the following configuration:

- **Models evaluated:** Qwen-VL 2.5, LLaVA-Next, Gemma 3
- **Method:** Present reference images with labels alongside target image
- **Prompt:** "simply pick the label from the sample images you see in prompt and tell me which one is closest to what you see"
- **Category mapping:**

|   |            |   |                        |
|---|------------|---|------------------------|
| i | initialize | s | stochastic exploration |
| n | near       | e | end state              |
| g | grab       | c | continuous pushing     |

Table 8: VLM fine-tuning configuration

| Model Configuration | Value                     | Training Parameters    | Value      |
|---------------------|---------------------------|------------------------|------------|
| Base model          | Qwen2.5-VL-7B-Instruct    | Learning rate          | 2e-5       |
| Quantization        | 8-bit, NF4 type           | Batch size             | 32         |
| Language LoRA rank  | 16                        | Epochs                 | 12         |
| Vision LoRA rank    | 8                         | Optimizer              | AdamW      |
| LoRA alpha          | 32                        | Weight decay           | 0.01       |
| Vision LoRA alpha   | 16                        | Warmup ratio           | 3%         |
| LoRA dropout        | 0.05                      | Precision              | FP16       |
| Target modules      | q/k/v/o/gate/up/down proj | Gradient checkpointing | Enabled    |
| Image resolution    | 224×224                   | Max sequence length    | 200 tokens |

Table 9: Performance on the “Lift” task comparing DDPM, DDIM, and Linear (SI Policy with linear interpolation) under varying inference steps. We used Euler ODE approximator for trained models for SIP. **Note that this is without distillation for SIP**

| Inference Steps | Diffusion Policy (DDPM) | Diffusion Policy (DDIM) | SI Policy (ours) |
|-----------------|-------------------------|-------------------------|------------------|
| 100             | <b>1.00</b>             | <b>1.00</b>             | <b>1.00</b>      |
| 50              | <b>1.00</b>             | 0.99                    | <b>1.00</b>      |
| 10              | 0.04                    | 0.03                    | <b>1.00</b>      |
| 5               | 0.03                    | 0.02                    | <b>1.00</b>      |
| 1               | 0.00                    | 0.03                    | <b>1.00</b>      |

Table 10: Success rates on the “Can” manipulation task: Comparing conventional diffusion methods (DDPM, DDIM) with our SI Policy using linear interpolation across different inference step counts. All models employ Euler ODE approximation without distillation.

| Inference Steps | Diffusion Policy (DDPM) | Diffusion Policy (DDIM) | SI Policy (ours) |
|-----------------|-------------------------|-------------------------|------------------|
| 100             | <b>1.00</b>             | <b>1.00</b>             | <b>1.00</b>      |
| 50              | 0.97                    | 0.98                    | <b>1.00</b>      |
| 10              | 0.00                    | 0.00                    | <b>1.00</b>      |
| 1               | 0.00                    | 0.00                    | <b>1.00</b>      |

Table 11: Representative **PushT** results with **VP** interpolation, using either **Euler** or **Heun**, in **ODE** or **SDE** mode, and varying numbers of steps. Performance (success rate) improves with more sophisticated solvers, showing that each configuration must be carefully tuned for optimal results.

| Interpolation                         | # Steps   | ODE / SDE | Approximator     | Final Step | Success Rate |
|---------------------------------------|-----------|-----------|------------------|------------|--------------|
| VP                                    | 10        | ODE       | Euler            | Euler      | 0.786        |
| VP                                    | 25        | ODE       | Euler            | Euler      | 0.897        |
| VP                                    | 50        | ODE       | Euler            | Euler      | 0.912        |
| VP                                    | 100       | ODE       | Euler            | Euler      | 0.918        |
| VP                                    | 100       | SDE       | Euler            | Linear     | 0.918        |
| VP                                    | 10        | ODE       | Heun             | Tweedie    | 0.881        |
| VP                                    | 25        | ODE       | Heun             | Tweedie    | 0.916        |
| VP                                    | 50        | ODE       | Heun             | Tweedie    | 0.920        |
| VP                                    | 100       | ODE       | Heun             | Tweedie    | 0.922        |
| VP                                    | 100       | SDE       | Heun             | Tweedie    | <b>0.926</b> |
| <b>Comparison of Diffusion Policy</b> |           |           |                  |            |              |
| Inference Steps                       | DP (DDPM) | DP (DDIM) | SI Policy (ours) |            |              |
| 10                                    | 0.125     | 0.810     | 0.881            |            |              |
| 25                                    | 0.214     | 0.813     | 0.916            |            |              |
| 50                                    | 0.801     | 0.812     | 0.920            |            |              |
| 100                                   | 0.807     | 0.810     | <b>0.926</b>     |            |              |

Table 12: **BlockPush** task success rate with GVP interpolation, comparing different approximators (Euler vs. Heun), ODE vs. SDE approaches, and final step methods. Results show that Heun with Tweedie correction achieves the highest success rates, while ODE performance scales with step count. The bottom section provides a direct comparison with standard Diffusion Policy.

| Interpolation                           | # Steps | ODE / SDE                     | Approximator | Final Step | Success Rate |
|-----------------------------------------|---------|-------------------------------|--------------|------------|--------------|
| GVP                                     | 1       | ODE                           | Euler        | -          | 0.026        |
| GVP                                     | 10      | ODE                           | Euler        | -          | 0.155        |
| GVP                                     | 25      | ODE                           | Euler        | -          | 0.199        |
| GVP                                     | 50      | ODE                           | Euler        | -          | 0.195        |
| GVP                                     | 100     | ODE                           | Euler        | -          | 0.200        |
| GVP                                     | 100     | SDE                           | Euler        | Euler      | 0.204        |
| GVP                                     | 100     | SDE                           | Euler        | Tweedie    | 0.205        |
| GVP                                     | 100     | SDE                           | Heun         | Euler      | 0.215        |
| GVP                                     | 100     | SDE                           | Heun         | Tweedie    | <b>0.227</b> |
| <b>Comparison with Diffusion Policy</b> |         |                               |              |            |              |
| Method                                  |         | Configuration                 |              |            | Success Rate |
| Diffusion Policy (DDPM)                 |         | 100 steps                     |              |            | 0.210        |
| SI Policy (ours)                        |         | GVP, Heun, Tweedie, 100 steps |              |            | <b>0.227</b> |

Table 13: Performance on the **Transport** task with VP interpolation, comparing different numbers of steps, ODE vs. SDE approaches, and approximators. Results show that performance is highly dependent on sufficient step count, with SDE approaches achieving slightly better performance.

| Interpolation                           | # Steps | ODE / SDE | Approximator            | Final Step | Success Rate |
|-----------------------------------------|---------|-----------|-------------------------|------------|--------------|
| VP                                      | 10      | ODE       | Euler                   | -          | 0.006        |
| VP                                      | 25      | ODE       | Euler                   | -          | 0.758        |
| VP                                      | 50      | ODE       | Euler                   | -          | 0.796        |
| VP                                      | 100     | ODE       | Euler                   | -          | 0.784        |
| VP                                      | 100     | SDE       | Euler                   | Euler      | <b>0.850</b> |
| VP                                      | 100     | SDE       | Heun                    | Tweedie    | <b>0.850</b> |
| <b>Comparison with Diffusion Policy</b> |         |           |                         |            |              |
| <b>Diffusion Policy (DDPM)</b>          |         |           | <b>SI Policy (ours)</b> |            |              |
| <b>0.852</b>                            |         |           | <b>0.850</b>            |            |              |

Table 14: Performance on the **Square** task with VP interpolation, comparing different numbers of steps, ODE vs. SDE approaches, and approximators.

| Interpolation                           | # Steps | ODE / SDE | Approximator | Final Step       | Success Rate |
|-----------------------------------------|---------|-----------|--------------|------------------|--------------|
| VP                                      | 10      | ODE       | Euler        | –                | 0.892        |
| VP                                      | 25      | ODE       | Euler        | –                | 0.950        |
| VP                                      | 50      | ODE       | Euler        | –                | 0.942        |
| VP                                      | 100     | ODE       | Euler        | –                | 0.926        |
| VP                                      | 100     | SDE       | Euler        | Euler            | <b>0.952</b> |
| <b>Comparison with Diffusion Policy</b> |         |           |              |                  |              |
| Inference Steps                         |         | DP (DDPM) | DP (DDIM)    | SI Policy (ours) |              |
| 10                                      |         | 0.000     | 0.928        | 0.892            |              |
| 50                                      |         | 0.916     | 0.943        | 0.942            |              |
| 100                                     |         | 0.944     | <b>0.962</b> | 0.952            |              |

Table 15: Tool Hang performance with VP interpolation across different configurations (averaged across 3 seeds)

| Interpolation                    | # Steps      | ODE/SDE      | Solver           | Success Rate |
|----------------------------------|--------------|--------------|------------------|--------------|
| VP                               | 1            | ODE          | Euler            | 0.000        |
| VP                               | 10           | ODE          | Euler            | 0.115        |
| VP                               | 25           | ODE          | Euler            | 0.345        |
| <b>VP</b>                        | <b>50</b>    | <b>ODE</b>   | <b>Euler</b>     | <b>0.381</b> |
| VP                               | 100          | ODE          | Euler            | 0.351        |
| VP                               | 10           | ODE          | Heun             | 0.342        |
| VP                               | 25           | ODE          | Heun             | 0.330        |
| VP                               | 50           | ODE          | Heun             | 0.371        |
| VP                               | 100          | ODE          | Heun             | 0.364        |
| VP                               | 100          | SDE          | Euler            | 0.357        |
| VP                               | 100          | SDE          | Heun             | 0.368        |
| Comparison with Diffusion Policy |              |              |                  |              |
| Step Count                       | DP (DDPM)    | DP (DDIM)    | SI Policy (ours) |              |
| 1                                | 0.000        | <b>0.482</b> | 0.000            |              |
| 10                               | 0.000        | <b>0.484</b> | 0.342            |              |
| 25                               | 0.000        | <b>0.486</b> | 0.371            |              |
| 50                               | <b>0.534</b> | 0.490        | 0.381            |              |
| 100                              | <b>0.484</b> | 0.480        | 0.368            |              |

*Note: Surprisingly, Diffusion Policy methods perform much better on Tool Hang than SI Policy consistently. DDPM achieves the highest overall success rate (0.534) at 50 steps, while DDIM shows remarkable consistency across all step counts, maintaining 0.48 success even at very low step counts.*

## Appendix D Data Collection and Annotation

This appendix details our methodology for collecting and annotating the dataset of 20,000 labeled robot states used for training and evaluating our difficulty classification models.

We developed a systematic approach to collect data of robot states across various manipulation tasks. Our data collection protocol was as follows:

### D.1 Episode Recording and Frame Extraction

We recorded complete episodes across six simulation environments (Can, Lift, Push T, Square, Tool Hang, and Transport). We extracted frames at regular intervals (every 5th frame) with additional adaptive sampling to ensure representation of critical states (e.g., precise grasping moments). This approach yielded approximately 20,000 frames for annotation.

### D.2 Annotation Process

Eight volunteers participated in the annotation process. Each annotator received tutorial videos for how to annotate each image for each task. A custom web-based annotation platform was used to help them annotate and each volunteer is given a distinct username.

### D.3 Difficulty Categories

The following categories were used to classify robot states based on computational requirements:

1. **Initial (I)**: The robot is positioned away from targets and objects, performing gross positioning movements in free space. No precise control is needed.
2. **Near (N)**: The robot is approaching within approximately 10cm of a target object but has not yet initiated contact or grasping. Some care in motion planning is required.
3. **Grabbing (G)**: The robot is in the process of grasping an object, or has grasped an object and is moving it to a new location. Moderate precision is required.
4. **Stochastic (S)**: The robot is attempting a precise placement or alignment task that requires controlled variability (e.g., inserting a tool, threading a needle). High precision with some exploration is needed.
5. **Continuous (C)**: The robot is pushing or manipulating an object without grasping, requiring continuous fine control with millimeter precision (e.g., pushing a block along a specific path).
6. **End (E)**: Task objectives have been achieved, and the robot is in a terminal state or moving away from completed objectives.

### D.4 Dataset Finalization

To ensure reliability, each state was labeled by multiple annotators. For the final dataset, we assigned category labels using majority voting. In cases of ties or significant disagreement, labels were adjudicated by a senior robotics researcher.

The most common boundary cases occurred between Near (N) and Grabbing (G) categories

These patterns reflect the continuous nature of difficulty transitions during task execution, with some states occupying boundary regions between categories.

The final dataset contains approximately 20,000 labeled states spanning all six difficulty categories across the different simulation environments, providing a comprehensive foundation for training our difficulty classifiers.
